# Supplementary material for: Highly efficient synthesis of cyclic ureas from CO2 and diamines by a pure CeO2 catalyst using a 2-propanol solvent
Source: Royal Society of Chemistry journal article supplement (doi:10.1039/c3gc40495a), 2013-01-01
Supplement: c3gc40495a.pdf [file c3gc40495a.pdf]

## Supplementary Information

### Highly Efficient Synthesis of Cyclic Ureas from CO<sub>2</sub> and Diamines by Pure CeO<sub>2</sub> Catalyst Using 2-Propanol Solvent

Masazumi Tamura,<sup>a</sup> Kensuke Noro,<sup>a</sup> Masayoshi Honda,<sup>a</sup> Yoshinao Nakagawa,<sup>a</sup> and Keiichi Tomishige<sup>a\*</sup>

<sup>a</sup> Graduate School of Engineering, Tohoku University, Aoba 6-6-07, Aramaki, Aoba-ku, Sendai, 980-8579 (Japan)

\*Corresponding author: e-mail: tomi@erec.che.tohoku.ac.jp

Tel.: +81-22-795-7214, fax.: +81-22-795-7214

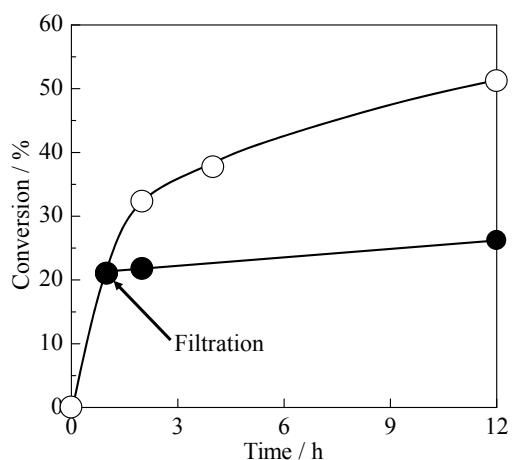

Fig. S1 Leaching test of the direct synthesis of **1** from CO<sub>2</sub> and ethylenediamine. Without removal of CeO<sub>2</sub> (○) and with removal of CeO<sub>2</sub> (●); an arrow indicates the removal of CeO<sub>2</sub> by filtration.

Reaction conditions: ethylenediamine (10 mmol), methanol (6.4 g), CeO<sub>2</sub> (0.085 g),  $P_{\text{CO}_2}$  = 0.5 MPa,  $T$  = 433 K.

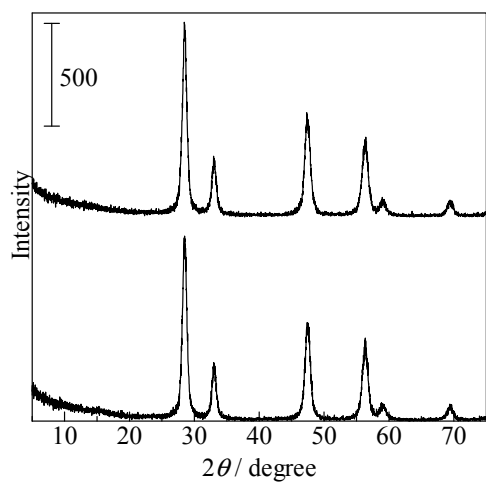

Fig. S2 XRD of (a) fresh CeO<sub>2</sub> and (b) CeO<sub>2</sub> used once.

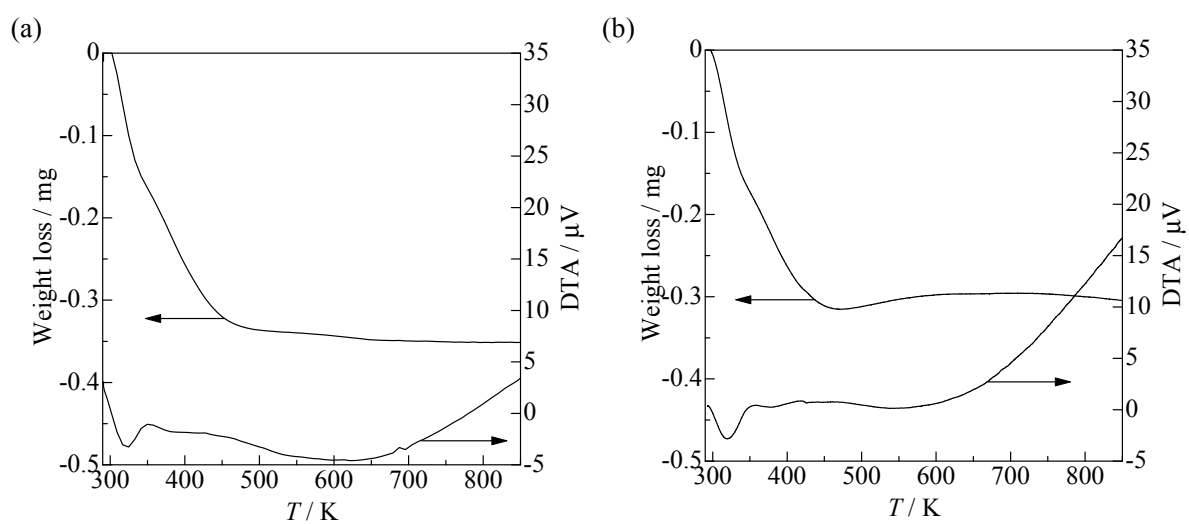

Fig. S3 TG-DTA profile of (a) fresh CeO<sub>2</sub> and (b) CeO<sub>2</sub> used once.

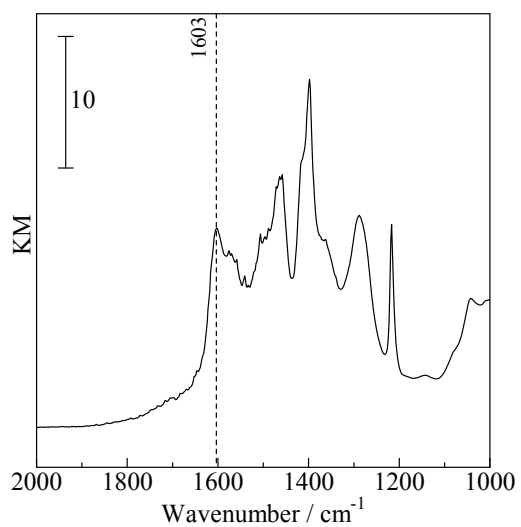

Fig. S4 FTIR spectrum of CO<sub>2</sub> adspecies on CeO<sub>2</sub> at 303 K.

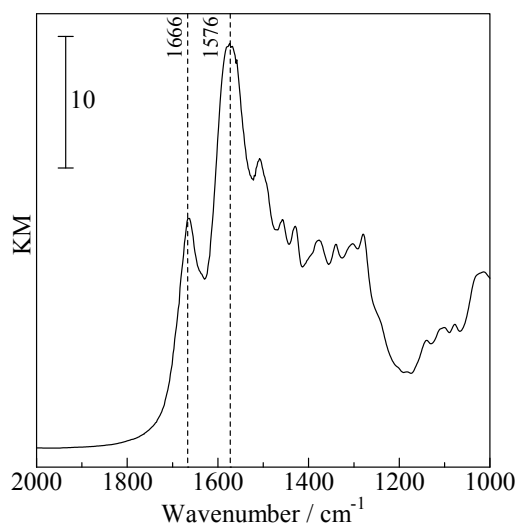

Fig. S5 FTIR spectrum of adspecies of **1** on CeO<sub>2</sub> at 423 K.
